# Supplementary material for: Assessing Immune-Related Adverse Events of Efficacious Combination Immunotherapies in Preclinical Models of Cancer
Source: Oxford University Press journal article supplement (doi:10.1158/0008-5472.can-16-0194), 2016-08-08
Supplement: 00085472can160194-sup-161183_1_supp_0_mmkll3.docx [file 00085472can160194-sup-161183_1_supp_0_mmkll3.docx]

Supplementary Materials and Methods

**Autoantibody detection**

Sera samples from all groups of mice were analyzed for the presence of anti-nuclear antibody (ANA) against cellular constituents and determined by an indirect immunofluorescence assay by testing serum reactivity against fixed HEp-2 cells as previously described ([1](#_ENREF_1)). Briefly, sera were diluted 1:50 in PBS and incubated on HEp-2 slides (Bio-Rad, USA). Sera antibodies were detected with anti-mouse IgG (H+L) Alexa488 (Invitrogen) and slides counterstained with DAPI (Sigma-Aldrich) before fluoromount added (Vector) and slides cover slipped. Slides were imaged on a Delta Vision Deconvolution Microscope (GE Life sciences) imaging 2-3 fields per sample and mean fluorescent intensity (MFI) minus background quantified using Softworx Suite v2.

Anti-dsDNA antibody levels in sera of mice were determined as previously described ([1](#_ENREF_1)). Briefly sera were incubated on ELISA plates (Nunc) coated with methylated BSA and sonicated calf thymus DNA (Sigma-Aldrich). Plates were washed and incubated with AP conjugated goat anti mouse IgG (H+L) or IgM (Life Technologies) before substrate was added (Sigma-Aldrich) and absorbance determined. Data is presented as Absorbance (405-650 nm) at a 1:50 serum dilution. Total IgG (H+L) concentrations in sera were determined by a sandwich ELISA. ELISA plates (Nunc) were coated plates with rabbit anti-mouse IgG (Southern Biotech) before serum samples titrated on plate along with mouse IgG (Sigma-Aldrich) as a standards. Plates were then incubated with HRP-conjugated anti-mouse IgG (H+L) (Life Technologies) before the addition of substrate (Sigma-Aldrich) and absorbance determined.

Aggregation of IgG in kidney glomeruli was determined by incubating 10 μM thick kidney sections, cut from fresh samples frozen in OCT compound (Tissue Tek) with anti-mouse IgG Alexa488 antibody (Invitrogen) before counterstaining with DAPI (Sigma). Kidney sections were then imaged by an Olympus IX61 fluorescent microscope (Olympus, Japan) and MFI within 5-12 glomeruli per section quantified by using ImageJ v1.44 (NIH, USA) software as previously described ([1](#_ENREF_1)).

**References**

1. Groom JR, Fletcher CA, Walters SN, Grey ST, Watt SV, Sweet MJ, et al. BAFF and MyD88 signals promote a lupuslike disease independent of T cells. J Exp Med. 2007;204:1959-71.
